# Supplementary material for: Identification of a novel methyltransferase, Bmt2, responsible for the N-1-methyl-adenosine base modification of 25S rRNA in Saccharomyces cerevisiae
Source: PubMed Central journal article supplement — Nucleic Acids Res. 2013 Apr 3;41(10):5428–43. doi: 10.1093/nar/gkt195 (PMC3664796; doi:10.1093/nar/gkt195), 2013-04-03
Supplement: supp_gkt195_nar-03279-r-2012-File003.pdf [file supp_gkt195_nar-03279-r-2012-File003.pdf]

## Supplementary Data

### Supplementary Figures

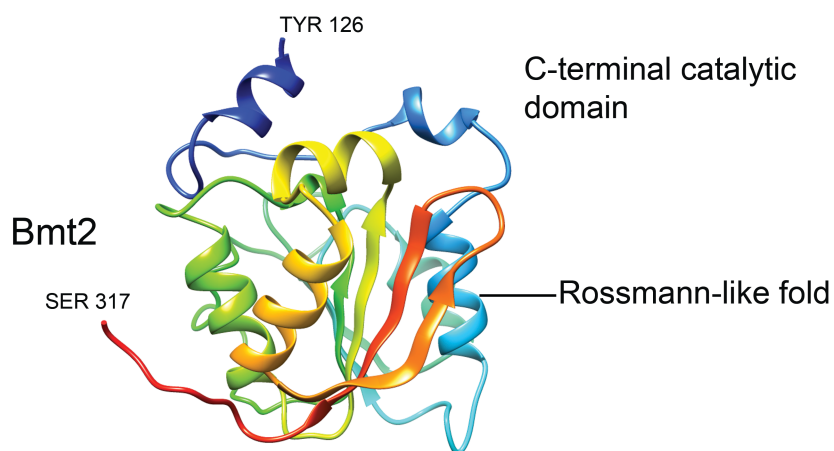

**Figure S1. Structural model of Bmt2.** Cartoon representing the 3D structure of the C-terminal catalytic domain of Bmt2. The model was constructed using the recent protocol described by Kelley et.al (2009). The 3D structure was constructed with sequence coverage of 52%, where 174 residues (52% of Bmt2 amino acid sequence) were modelled with 99.3% confidence by the single highest scoring template. This model further reinforced Bmt2 to be an Ado Met methyltransferase with the characteristic  $\beta$  sheets surrounded by helices belonging to Rossmann-fold superfamily.

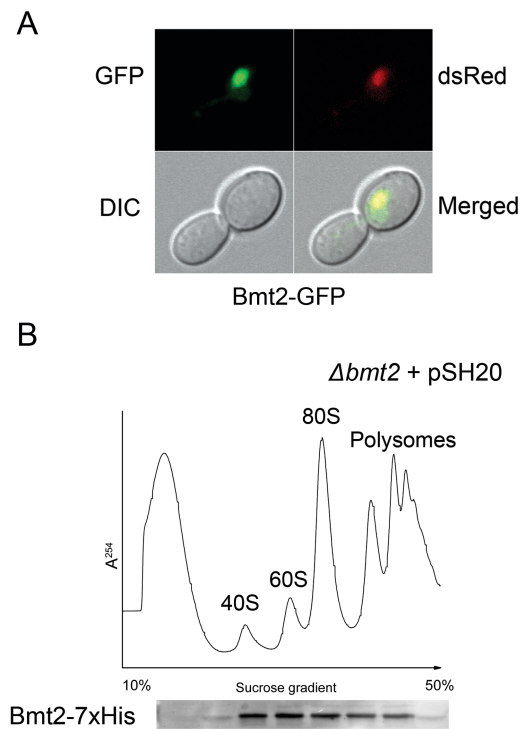

**Figure S2. Cellular localization of the Bmt2 and its ribosomal association.** (A) To test the nucleolar localization of Bmt2, pSH18 carrying Bmt2-GFP fusion constructs were transformed into strain ScNop56-mRFP and visualized with Leica TCS SP5. (B) To investigate any ribosomal or pre-ribosomal association of the Bmt2, plasmid pSH20 carrying heptahistidine tagged Bmt2 under a *TDH3* promoter, were transformed into *Δbmt2* mutant strain. The polysome profile was made from the transformed strain and the fractions corresponding to the cytoplasm, 40S, 60S, 80S, and polysomes were collected. The proteins from these fractions were precipitated and a western blot using anti-His antibodies was performed. The recombinant Bmt2 co-localized with the ribosomes.

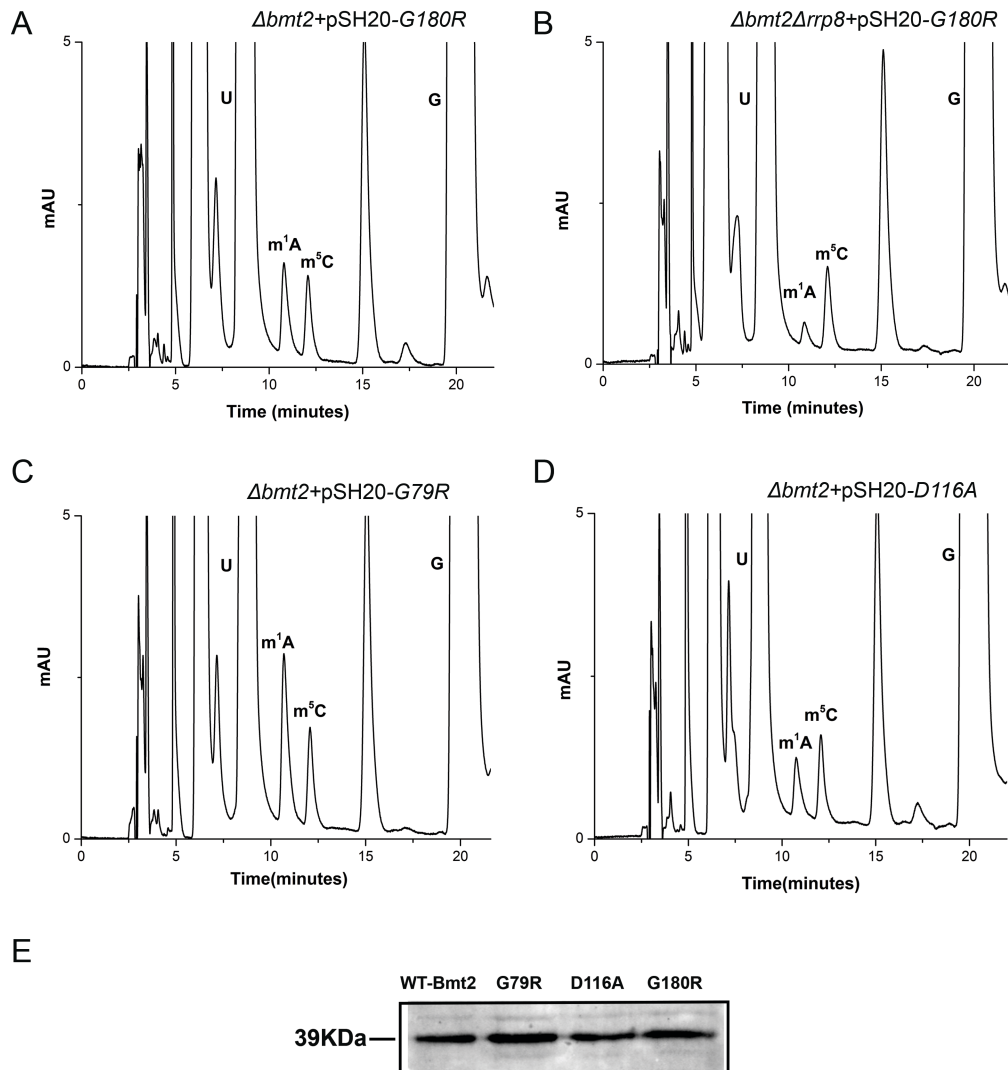

**Figure S3. RP-HPLC analysis of the Bmt2-point mutants.** The RP-HPLC chromatogram from the nucleosides derived from the 25S rRNA of  $\Delta bmt2$  strain carrying mutant bmt2 protein, where amino acid glycine180 was substituted with an arginine (*G180R*) (A). B) RP-HPLC chromatogram from the nucleosides derived from the 25S rRNA of  $\Delta bmt2 \Delta rrp8$  strain carrying mutant bmt2-*G180R* protein. C) RP-HPLC chromatogram from the nucleosides derived from the 25S rRNA of  $\Delta bmt2$  strain carrying mutant protein bmt2-*G79R* and (D) bmt2-*D116A*. The mutant bmt2 proteins were expressed from plasmids pSH20-*G180R*, pSH20-*G79R*, pSH20-*D116A*. The substitution of *G180R* and *D116A* influenced the catalytic function of Bmt2, as seen by loss of  $m^1A$  peak in the mutants. Interestingly, the bmt2-*G180R* possessed a slight residual activity as observed in  $\Delta bmt2 \Delta rrp8$  strain. E) Western blot analysis with the mutant proteins bmt2-*G79R*, bmt2-*D116A* and bmt2-*G180R* using the anti-His antibodies. The mutant proteins were expressed as C-terminally heptahistidine tagged protein from the respective plasmid.

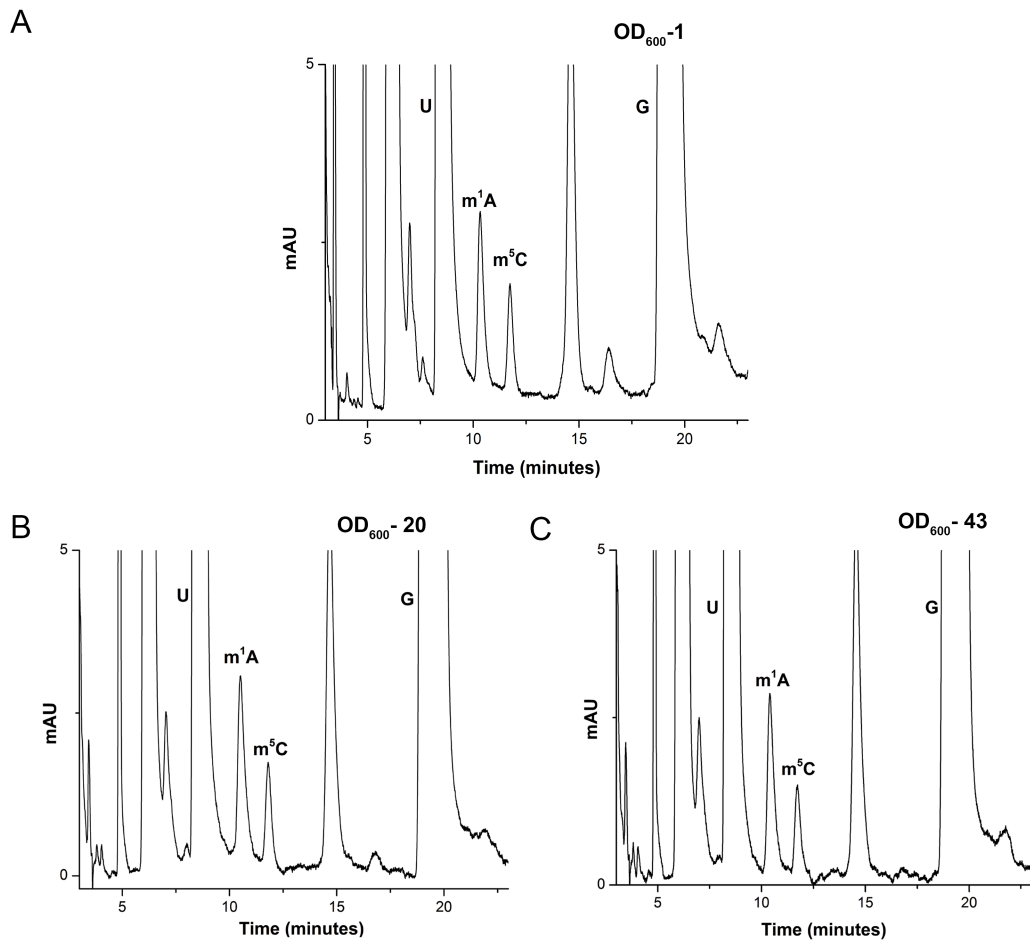

**Figure S4. Investigation of  $m^1A$  modification of 25S rRNA at different growth phase.** The RP-HPLC chromatogram from the 25S rRNA derived from the culture grown at different growth phase. A) RP-HPLC Chromatogram of the 25S rRNA from the yeast cell culture at early exponential phase ( $OD_{600}-1$ ). B) RP-HPLC Chromatogram of the 25S rRNA from the yeast cell culture at the end of first growth phase ( $OD_{600}-20$ ), where the glucose is completely depleted. C) RP-HPLC Chromatogram of the 25S rRNA from the yeast cell culture at stationary phase  $OD_{600}-43$ , where all carbon sources are depleted.

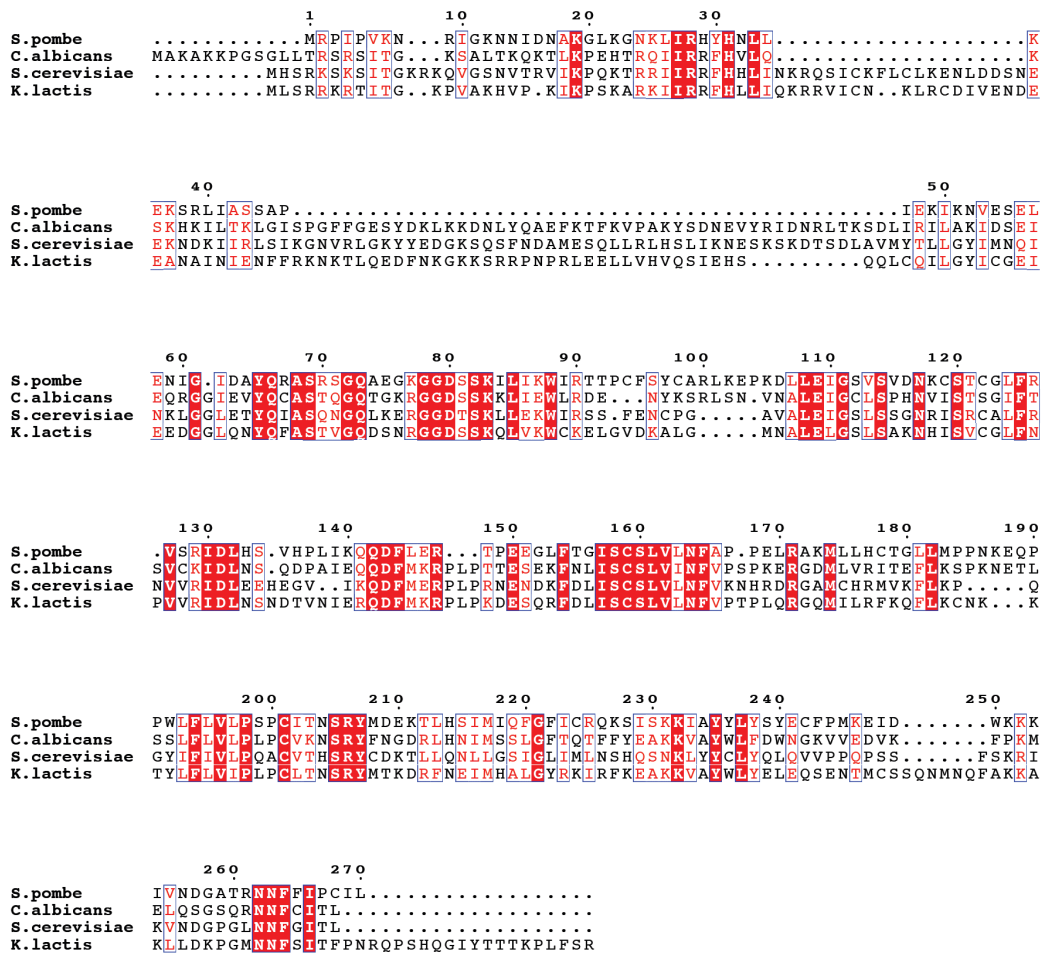

**Figure S5. Bmt2 homology among different yeasts.** The amino acid sequence of Bmt2 from *S. cerevisiae*, *K. lactis*, *C. albicans* and *S. pombe* were aligned using ClustalW2 (EMBL-EBI) and the alignment file was analyzed with EsPrnt 2.2. The Bmt2 protein is highly conserved among these organisms.

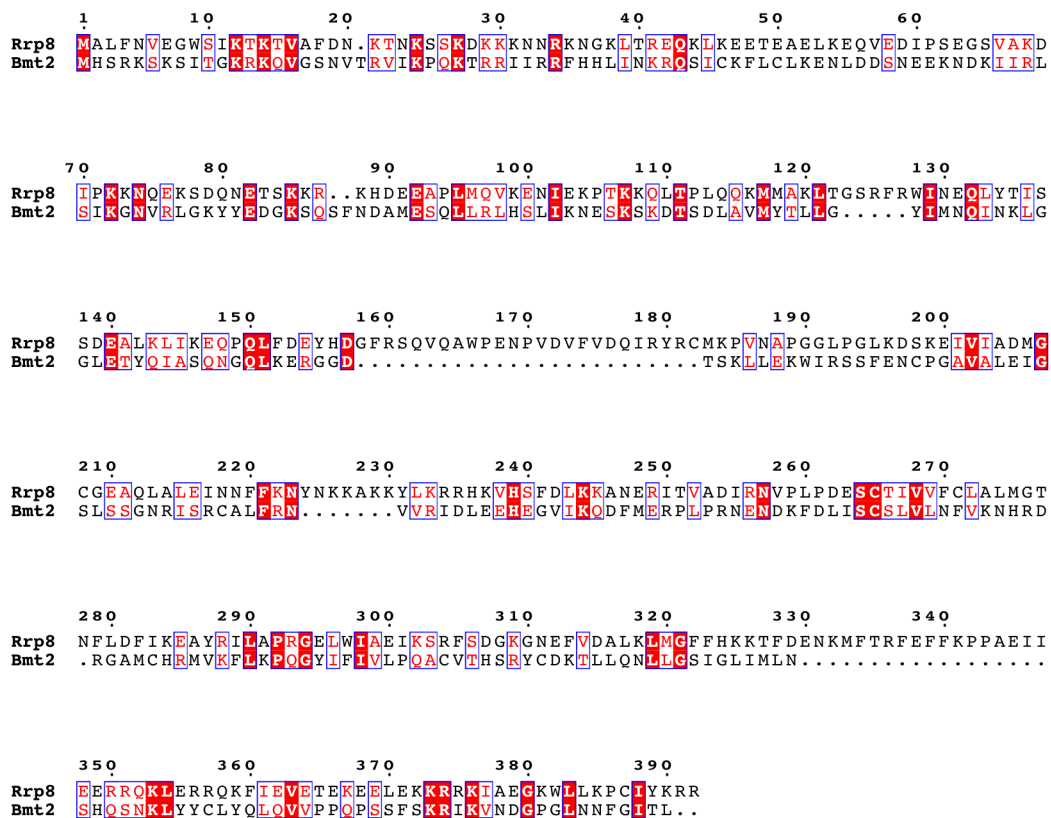

**Figure. S6. Amino acid sequence alignment of Bmt2 and Rrp8.** The complete amino acid sequence of Bmt2 and Rrp8 from *S. cerevisiae* was aligned using ClustalW2 (EMBL-EBI) and the alignment files was analyzed with EsPript 2.2. The Bmt2 protein and Rrp8 share significant homology. Both Rrp8 and Bmt2 are the class I methyltransferases responsible for m<sup>1</sup>A modification of 25S rRNA at position 645 and 2142, respectively.

## Supplementary Tables

**Table S1: Yeast Strains**

| Strain        | Genotype                                                                                                                         | Origin                                                                                                         |
|---------------|----------------------------------------------------------------------------------------------------------------------------------|----------------------------------------------------------------------------------------------------------------|
| Y10000        | BY4742; MAT $\alpha$ ; his3 $\Delta$ 1; leu2 $\Delta$ 0; lys2 $\Delta$ 0; ura3 $\Delta$ 0                                        | EUROSCARF                                                                                                      |
| Y13280        | BY4742; MAT $\alpha$ ; his3 $\Delta$ 1; leu2 $\Delta$ 0; lys2 $\Delta$ 0; ura3 $\Delta$ 0; YBR141c::up-kanMX4-down               | EUROSCARF                                                                                                      |
| Y04018        | BY4741; MAT $\alpha$ ; his3 $\Delta$ 1; leu2 $\Delta$ 0; met15 $\Delta$ 0; ura3 $\Delta$ 0; YDR083w::up-kanMX4-down              | EUROSCARF                                                                                                      |
| ScNop56-mRFP  | MAT $\alpha$ , his3 $\Delta$ 1, leu2 $\Delta$ 0, lys2 $\Delta$ 0, ura3 $\Delta$ 0 Sik1-RFP-KANMX6 (in BY4742)                    | Huh et al. Nature, 2003                                                                                        |
| CEN.PK920-1C  | MAT $\alpha$ ura3-52 trp1-289 leu2-3, 112 his3 $\Delta$ 1 $\Delta\Delta$ rdn::pNOY455 [HIS3] + pRDN-hyg1(pNOY290) [URA3, leu2D]  | Meyer et al., 2011                                                                                             |
| BY.PK1022-6D  | MAT $\alpha$ ; his3 $\Delta$ 1; leu2 $\Delta$ 0; met15 $\Delta$ 0; ura3 $\Delta$ 0; ybr141c::up-kanMX4-down rrp8::up-kanMX4-down | This study (from crossing Y13280 x Y04018)                                                                     |
| CEN.PK1167-1C | MAT $\alpha$ ura3-52 trp1-289 leu2-3,112 his3 $\Delta$ 1 $\Delta\Delta$ rdn::pNOY455 [HIS3] + pPK622 (A2142C)                    | This study (CEN.PK920-1C after transformation with pPK622 and plasmid loss of pRDN-hyg1 after 5-FOA selection) |
| CEN.PK1168-1C | MAT $\alpha$ ura3-52 trp1-289 leu2-3,112 his3 $\Delta$ 1 $\Delta\Delta$ rdn::pNOY455 [HIS3] + pPK623 (A2142T)                    | This study (CEN.PK920-1C after transformation with pPK622 and plasmid loss of pRDN-hyg1 after 5-FOA selection) |
| CEN.PK1169-1C | MAT $\alpha$ ura3-52 trp1-289 leu2-3,112 his3 $\Delta$ 1 $\Delta\Delta$ rdn::pNOY455 [HIS3] + pPK624 (A2142G)                    | This study (CEN.PK920-1C after transformation with pPK622 and plasmid loss of pRDN-hyg1 after 5-FOA selection) |

**Table S2: Plasmids**

| <b>Plasmid</b>      | <b>Description</b>                                                                                 | <b>Origin</b>             |
|---------------------|----------------------------------------------------------------------------------------------------|---------------------------|
| pPK468              | High copy number plasmid carrying <i>URA3</i> marker, 2 $\mu$ ori, amp                             | P. Kötter                 |
| pSH18               | A derivative pUG35 plasmid carrying Bmt2-GFP fusion proteins                                       | This study                |
| pSH20               | A derivative pPK468 plasmid carrying Bmt2-7xHis fusion protein                                     | This study                |
| pSH20- <i>G180R</i> | A derivative pSH20 plasmid carrying bmt2- <i>G180R</i> -7xHis fusion protein                       | This study                |
| pSH20- <i>G79R</i>  | A derivative pSH20 plasmid carrying bmt2- <i>G79R</i> -7xHis fusion protein                        | This study                |
| pSH20- <i>D116A</i> | A derivative pSH20 plasmid carrying bmt2- <i>D116A</i> -7xHis fusion protein                       | This study                |
| pAV164              | High copy number plasmid carrying wild type rDNA with the <i>TRP1</i> marker and <i>leu2d</i> gene | Chernoff et al., 1994 (1) |
| pPK622              | A derivative of pAV164 plasmid carrying mutant A2142C 25SrDNA                                      | This study                |
| pPK623              | A derivative of pAV164 plasmid carrying mutant A2142T 25SrDNA                                      | This study                |
| pPK624              | A derivative of pAV164 plasmid carrying mutant A2142C 25SrDNA                                      | This study                |



**Table S3: Oligonucleotides**

| <b>Oligonucleotides</b> | <b>Sequence</b>                                                                       |
|-------------------------|---------------------------------------------------------------------------------------|
| pSH18 FP                | TACATAGATACAATTCTATTACCCCATCCATACTCTAGAATGCATTCAAGAAAGTCGAAG                          |
| pSH18 RP                | TTGGGACAACACCAGTGAATAATTCTTCACCTTTAGACATGAGGGTAATACCAAATTGTTT                         |
| pSH20 FP                | ACCAAGAACTTAGTTTCGAATAAACACACATAAACAAACG ATGCATTCAAGAAAGTCGAAG                        |
| pSH20 RP                | TATAAAAAGAAAATTTATTTAAATGCAAGATTTAAAGTAGTTAGTGATGGTGTGATGGTGGAGGG<br>TAATACCAAATTGTTT |
| 25S-A2142               | GCACTGGGCAGAAATCACATTGCG                                                              |
| oligo-645               | CACTCGCATAGACGTTAGACTCCTTGGTCCGTGTTTCAAGACGGGCGG                                      |
| oligo-2142              | CTGACCATCGCAATGCTATGTTTTAATTAGACAGTCAGATTCCCCTTG                                      |
| 25S-Mut3                | TCTGACTGTCTAATTBAAACATAGCATTGCG                                                       |
| 25S-Mut4                | CAATGCTATGTTTVAATTAGACAGTCAGATTCC                                                     |
| ITS1 (D-A2)             | GATTGCTCGAATGCCCAAAG                                                                  |
| ITS2 (C1-C2)            | CGCCTAGACGCTCTCTTCTTA                                                                 |
| bmt2-G180R FP           | GGAGCAGTGGCATTAGAAATTCGTTTCATTGAGCTCCGGAAATC                                          |
| bmt2-G180R-RP           | GATTTCCGGAGCTCAATGAACGAATTTCTAATGCCACTGCTCC                                           |
| bmt2-G79R-RP            | ATCAGGTTAAGTATTAAGGTAATGTAAGACTGCGCAAGTACTATGAAGACGGCAAATCG                           |
| bmt2-G79R-RP            | TTTGCCGTCTTCATAGTACTTGCGCAGTCTTACATTACCTTTAATACTTAACCTGATAATTTTG                      |
| bmt2-D116A-RP           | CATTAATTAATAAATGAATCCAAATCAAAGGATACTTCTGCCTTGGCTGTGATGTACACATTACTTGGTTAC              |
| bmt2-D116A-RP           | ACCAAGTAATGTGTACATCACAGCCAAGGCAGAAGTATCCTTTGATTTGGATTCATTTTTAATTAATGAGTG              |

## References

1. Chernoff, Y.O., Vincent, A. and Liebman, S.W. (1994) Mutations in eukaryotic 18S ribosomal RNA affect translational fidelity and resistance to aminoglycoside antibiotics. *The EMBO Journal*, **13**, 906–913.
